# Supplementary material for: Spatiotemporal Evaluation of Water Quality and Hazardous Substances in Small Coastal Streams According to Watershed Characteristics
Source: MDPI journal article supplement (doi:10.3390/ijerph19020634), 2022-01-06
Supplement: s1 [file s1]

*Supplementary materials*

# **Spatiotemporal Evaluation of Water Quality and Hazardous Substances in Small Coastal Streams According to Watershed Characteristics**

**Han-Saem Lee<sup>1</sup>, Sy-Jin Lim<sup>1</sup>, Byung-Ran Lim<sup>1</sup>, Hong-Seok Kim<sup>2</sup>, Heung-Soo Lee<sup>3</sup>, Tae-Ung Ahn<sup>4</sup>, and Hyun-Sang Shin<sup>1,\*</sup>**

<sup>1</sup> Department of Environment Energy Engineering, Seoul National University of Science & Technology; hansun213@seoultech.ac.kr, d8066530314@daum.net, limbr@seoultech.ac.kr

<sup>2</sup> Korea Testing and Research Institute; hskim@ktr.or.kr

<sup>3</sup> Gyeonggi-do Environmental Preservation Association; hsleewater@epa.or.kr

<sup>4</sup> Environment Solution Partners; ahntu@naver.com

\* Correspondence: hyuns@seoultech.ac.kr; Tel.: +82-2-970-6625

**Table S1.** Sampling site and coastal stream stage.

| no. |     | type          | site      | GPS         |              | watershed<br>area<br>(km <sup>2</sup> ) | coastal stream stage |           |           |
|-----|-----|---------------|-----------|-------------|--------------|-----------------------------------------|----------------------|-----------|-----------|
|     |     |               |           | longitude   | latitude     |                                         | main                 | primary   | secondary |
| 1   | W1  | surface water | Yangtaek  | 37°44'53" N | 126°36'40" E | 7.49                                    | West sea             | Yangtaek  | -         |
| 2   | W2  | surface water | Gaehwa    | 37°44'42" N | 126°34'56" E | 9.76                                    | West sea             | Gaehwa    | -         |
| 3   | W3  | surface water | Ponae     | 37°71'84" N | 126°53'54" E | 22.41                                   | West sea             | Ponae     | -         |
| 4   | W4  | surface water | Seokjeong | 37°68'57" N | 126°54'17" E | 4.39                                    | West sea             | Seokjeong | -         |
| 5   | W5  | surface water | Samdongam | 37°70'09" N | 126°46'96" E | 32.50                                   | West sea             | Samdongam | -         |
| 6   | W6  | surface water | Geomdan   | 37°60'49" N | 126°64'65" E | 18.74                                   | West sea             | Geomdan   | -         |
| 7   | W7  | surface water | Daepo     | 37°66'32" N | 126°65'88" E | 3.30                                    | West sea             | Geomdan   | Daepo     |
| 8   | W8  | surface water | Gongchon  | 37°54'40" N | 126°64'94" E | 18.77                                   | West sea             | Gongchon  | -         |
| 9   | W9  | surface water | Simgok    | 37°52'50" N | 126°63'74" E | 18.45                                   | West sea             | Simgok    | -         |
| 10  | W10 | surface water | Seunggi   | 37°39'64" N | 126°67'49" E | 33.58                                   | West sea             | Seunggi   | -         |
| 11  | W11 | surface water | Jangsu    | 37°43'27" N | 126°73'56" E | 19.64                                   | West sea             | Jangsu    | -         |
| 12  | W12 | surface water | Singil    | 37°32'58" N | 126°75'40" E | 8.75                                    | West sea             | Singil    | -         |
| 13  | W13 | surface water | Hwajeong  | 37°31'25" N | 126°82'08" E | 14.97                                   | West sea             | Ansan     | Hwajeong  |
| 14  | W14 | surface water | Jaan      | 37°16'23" N | 126°85'28" E | 53.15                                   | West sea             | Jaan      | -         |
| 15  | W15 | surface water | Balan     | 37°04'54" N | 126°53'06" E | 82.54                                   | West sea             | Balan     | -         |
| 16  | W16 | surface water | Geumgok   | 37°11'62" N | 126°88'99" E | 9.43                                    | West sea             | Balan     | Geumgok   |

**Table S2.** Water quality grade depending on water quality indicators.

| grade | state         | water quality indicator |                  |                  |                 |                 |                 |
|-------|---------------|-------------------------|------------------|------------------|-----------------|-----------------|-----------------|
|       |               | BOD <sup>a</sup>        | COD <sup>a</sup> | TOC <sup>a</sup> | SS <sup>b</sup> | TN <sup>b</sup> | TP <sup>a</sup> |
| Ia    | excellent     | ≤ 1                     | ≤ 2              | ≤ 2              | ≤ 1             | ≤ 1             | ≤ 0.02          |
| Ib    | good          | ≤ 2                     | ≤ 4              | ≤ 3              | ≤ 5             | ≤ 2             | ≤ 0.04          |
| II    | slightly good | ≤ 3                     | ≤ 5              | ≤ 4              | ≤ 10            | ≤ 3             | ≤ 0.10          |
| III   | fair          | ≤ 5                     | ≤ 7              | ≤ 5              | ≤ 15            | ≤ 5             | ≤ 0.20          |
| IV    | slightly poor | ≤ 8                     | ≤ 9              | ≤ 6              | ≤ 25            | ≤ 10            | ≤ 0.30          |
| V     | poor          | ≤ 10                    | ≤ 11             | ≤ 8              | ≤ 100           | ≤ 15            | ≤ 0.50          |
| VI    | very poor     | > 10                    | > 11             | > 8              | > 100           | > 15            | > 0.50          |

<sup>a</sup> from river criteria of the basic law of Environmental Policy, South Korea

<sup>b</sup> modified from lake criteria of the basic law of Environmental Policy, South Korea

**Table S3.** Instrument operating conditions depending on the analysis group (see the **Table 2**).

|                             | group                                      |                                                        |                                         |
|-----------------------------|--------------------------------------------|--------------------------------------------------------|-----------------------------------------|
|                             | A                                          | B                                                      | D                                       |
| instrument                  | GC-MS/MS                                   | LC-MS/MS                                               | LC-MS/MS                                |
| column                      | DB-5MS(Agilent, 30 m×<br>0.250 mm, 0.25um) | Poroshell 120 SB-C18,<br>2.7um 2.1 x 100mm             | Eclipse plus c18 (3.0 ×<br>150 mm, 3µm) |
| injector temp.              | 260 °C                                     | -                                                      | -                                       |
| source temp.                | 280 °C                                     | -                                                      | -                                       |
| column temp.                |                                            | 40 °C                                                  | 30 °C                                   |
| carrier gas/mobile<br>phase | He                                         | A : water<br>(in 0.1% formic acid)<br>B : acetonitrile | 200mM methylamine<br>solution in water  |
| flow                        | 2.25 mL/min                                | 0.3 mL/min                                             | 0.35 mL/min                             |

  

| oven temp. program for analysis group A |               |                |  |
|-----------------------------------------|---------------|----------------|--|
| Temp.( °C)                              | Rate(°C /min) | Hold time(min) |  |
| 40                                      | -             | 3              |  |
| 150                                     | 20            | 1              |  |
| 280                                     | 0             | 3              |  |

  

| gradient condition for analysis group B |    |    |  |
|-----------------------------------------|----|----|--|
| Time                                    | A% | B% |  |
| 0.0                                     | 95 | 5  |  |
| 0.5                                     | 85 | 15 |  |
| 1.0                                     | 60 | 40 |  |
| 8.0                                     | 2  | 98 |  |
| 10.0                                    | 2  | 98 |  |
| 10.1                                    | 95 | 5  |  |

**Table S4.** Instrument operating conditions of ICP-MS.

|          | Instrument Parameters     | Setting range for STD, KED sensitivity |
|----------|---------------------------|----------------------------------------|
| Main     | Torch Hoizontal           | -1.3 mm                                |
|          | Torch Vertical            | -0.65 mm                               |
|          | Nebulizer gas             | 1.1157 L/min                           |
|          | Extraction Lens           | -156.0 V                               |
|          | CCT Focus lens            | -0.24 V                                |
| Inlet    | Peristaltic Pump Speed    | 40.0 rpm                               |
|          | Spray Chamber Temperature | 2.70 °C                                |
| Plasma   | Cool gas                  | 14.0 L/min                             |
|          | Auxilliary gas            | 0.8 L/min                              |
|          | Plasma power              | 1550.0 W                               |
| Q-Cell   | Collision gas 1           | 4.344 mL/min                           |
|          | Collision gas 2           | 0.0 mL/min                             |
|          | Pole Bias                 | -18.0 V                                |
|          | CCT Bias                  | -21.0 V                                |
| Advanced | Extration Lens 1 Positive | 0.0 V                                  |
|          | Focus Lens                | -7.5 V                                 |
|          | Sampling Depth            | 5 mm                                   |
| Gas      | Ar                        | 6 bar                                  |
|          | He                        | 2 bar                                  |

**Table S5.** Mean and standard deviation of water quality grade of each indicator according to site and season.

| site | Flowrate (m <sup>3</sup> /s) |         | BOD (mg/L) |        | COD (mg/L) |        | TOC (mg/L) |        | SS (mg/L) |        | TN (mg/L) |        | TP (mg/L) |        |
|------|------------------------------|---------|------------|--------|------------|--------|------------|--------|-----------|--------|-----------|--------|-----------|--------|
|      | dry                          | wet     | dry        | wet    | dry        | wet    | dry        | wet    | dry       | wet    | dry       | wet    | dry       | wet    |
| W1   | 0.017                        | 0.025   | 3.78       | 5.38   | 8.10       | 9.38   | 4.44       | 4.97   | 5.31      | 12.8   | 7.79      | 7.74   | 2.21      | 1.82   |
|      | (0.008) <sup>a</sup>         | (0.020) | (1.22)     | (4.22) | (0.88)     | (2.04) | (1.65)     | (1.54) | (2.42)    | (11.1) | (1.20)    | (3.77) | (0.85)    | (1.30) |
| W2   | 0.022                        | 0.047   | 7.08       | 5.82   | 10.0       | 9.64   | 6.42       | 6.23   | 7.17      | 10.6   | 6.33      | 5.98   | 0.59      | 0.45   |
|      | (0.012)                      | (0.043) | (3.66)     | (2.17) | (3.10)     | (2.44) | (2.35)     | (2.53) | (4.22)    | (5.99) | (1.64)    | (1.34) | (0.68)    | (0.29) |
| W3   | 0.176                        | 0.263   | 3.02       | 4.08   | 6.46       | 7.64   | 3.30       | 4.06   | 3.97      | 7.30   | 5.84      | 5.10   | 0.19      | 0.16   |
|      | (0.067)                      | (0.121) | (0.77)     | (2.00) | (0.43)     | (2.13) | (0.82)     | (1.09) | (1.51)    | (3.46) | (0.60)    | (0.83) | (0.02)    | (0.07) |
| W4   | 0.033                        | 0.032   | 9.2        | 8.7    | 15.6       | 15.4   | 8.61       | 8.58   | 12.7      | 12.9   | 5.61      | 5.69   | 0.46      | 0.45   |
|      | (0.026)                      | (0.012) | (5.72)     | (6.19) | (13.6)     | (9.88) | (7.41)     | (6.96) | (10.9)    | (6.92) | (1.11)    | (2.39) | (0.22)    | (0.39) |
| W5   | 0.066                        | 0.054   | 1.38       | 1.77   | 3.83       | 4.99   | 2.03       | 2.81   | 3.47      | 5.17   | 6.93      | 5.72   | 0.08      | 0.10   |
|      | (0.061)                      | (0.053) | (0.40)     | (1.99) | (0.79)     | (3.38) | (0.41)     | (1.83) | (2.85)    | (9.13) | (2.14)    | (1.38) | (0.01)    | (0.05) |
| W6   | 0.049                        | 0.087   | 15.0       | 13.6   | 13.0       | 14.8   | 5.51       | 8.00   | 8.75      | 13.8   | 6.02      | 5.93   | 0.52      | 0.70   |
|      | (0.022)                      | (0.048) | (7.97)     | (3.88) | (3.89)     | (6.46) | (1.97)     | (3.52) | (4.40)    | (23.2) | (0.80)    | (1.69) | (0.08)    | (0.73) |
| W7   | 0.022                        | 0.024   | 7.68       | 6.71   | 10.5       | 11.3   | 5.79       | 6.69   | 10.2      | 12.0   | 8.48      | 6.79   | 0.28      | 0.27   |
|      | (0.014)                      | (0.011) | (4.64)     | (1.90) | (2.13)     | (2.41) | (1.74)     | (3.11) | (6.05)    | (10.6) | (2.14)    | (1.84) | (0.06)    | (0.12) |
| W8   | 0.123                        | 0.171   | 1.80       | 2.18   | 4.55       | 6.17   | 2.35       | 3.14   | 4.95      | 22.0   | 6.11      | 6.14   | 0.12      | 0.15   |
|      | (0.101)                      | (0.079) | (0.55)     | (1.67) | (1.39)     | (3.21) | (0.85)     | (1.64) | (1.66)    | (72.9) | (1.89)    | (1.13) | (0.14)    | (0.09) |
| W9   | 0.309                        | 0.316   | 5.25       | 3.54   | 8.55       | 8.01   | 4.52       | 4.35   | 7.54      | 9.09   | 8.75      | 6.62   | 0.39      | 0.31   |
|      | (0.106)                      | (0.218) | (5.10)     | (0.51) | (0.81)     | (1.33) | (1.16)     | (1.14) | (3.89)    | (4.53) | (3.94)    | (0.96) | (0.24)    | (0.08) |
| W10  | 0.198                        | 0.246   | 1.98       | 2.81   | 6.00       | 6.41   | 3.38       | 3.67   | 6.60      | 26.1   | 6.75      | 3.70   | 0.16      | 0.14   |
|      | (0.073)                      | (0.087) | (0.61)     | (9.77) | (0.67)     | (2.80) | (0.39)     | (3.79) | (3.30)    | (85.7) | (1.90)    | (1.89) | (0.05)    | (0.07) |
| W11  | 0.174                        | 0.137   | 2.65       | 3.17   | 5.30       | 6.73   | 2.48       | 3.28   | 27.9      | 34.4   | 2.57      | 2.38   | 0.09      | 0.15   |
|      | (0.067)                      | (0.060) | (0.44)     | (0.98) | (0.90)     | (1.93) | (0.43)     | (1.11) | (16.6)    | (29.7) | (0.39)    | (0.74) | (0.04)    | (0.17) |
| W12  | 0.069                        | 0.113   | 3.94       | 6.25   | 7.65       | 13.0   | 3.54       | 6.96   | 6.40      | 9.53   | 6.42      | 7.79   | 0.59      | 1.51   |
|      | (0.014)                      | (0.037) | (3.81)     | (11.7) | (3.35)     | (11.7) | (1.13)     | (3.16) | (8.36)    | (4.08) | (4.25)    | (7.10) | (1.07)    | (4.58) |
| W13  | 0.148                        | 0.125   | 2.01       | 2.86   | 5.41       | 7.49   | 2.57       | 3.69   | 5.72      | 12.2   | 2.51      | 2.29   | 0.05      | 0.08   |
|      | (0.041)                      | (0.009) | (0.87)     | (1.33) | (0.49)     | (2.80) | (0.33)     | (1.91) | (2.64)    | (12.4) | (0.65)    | (1.85) | (0.01)    | (0.02) |
| W14  | 0.113                        | 0.129   | 1.17       | 1.90   | 4.28       | 5.99   | 2.40       | 3.55   | 3.82      | 8.14   | 4.54      | 4.06   | 0.10      | 0.34   |
|      | (0.031)                      | (0.044) | (37)       | (0.73) | (0.23)     | (1.84) | (0.38)     | (1.93) | (3.00)    | (13.3) | (0.74)    | (3.01) | (0.02)    | (1.09) |
| W15  | 0.117                        | 0.207   | 1.77       | 2.80   | 4.83       | 6.41   | 2.65       | 3.67   | 4.70      | 9.62   | 4.35      | 3.70   | 0.10      | 0.14   |
|      | (0.046)                      | (0.175) | (0.64)     | (2.18) | (0.60)     | (2.27) | (0.08)     | (2.37) | (2.86)    | (15.7) | (1.44)    | (2.41) | (0.03)    | (0.16) |
| W16  | 0.086                        | 0.309   | 2.96       | 2.93   | 11.5       | 11.2   | 8.92       | 8.86   | 17.4      | 20.7   | 8.96      | 7.76   | 0.16      | 0.20   |
|      | (0.046)                      | (0.443) | (0.87)     | (1.27) | (2.34)     | (2.60) | (2.00)     | (2.12) | (12.5)    | (20.8) | (3.28)    | (1.16) | (0.08)    | (0.07) |

<sup>a</sup> standard deviation

**Table S6.** Mean value (µg/L) of hazardous substances in coastal stream with respect to the month.

| no. | compound                      | month (µg/L)    |        |        |        |        |        |        |        |        |        |        |        |
|-----|-------------------------------|-----------------|--------|--------|--------|--------|--------|--------|--------|--------|--------|--------|--------|
|     |                               | 1               | 2      | 3      | 4      | 5      | 6      | 7      | 8      | 9      | 10     | 11     | 12     |
| V1  | <i>o</i> -xylene              | ND <sup>a</sup> | 0.0988 | ND     | 0.2625 | 1.1210 | 0.0547 | 0.4619 | 0.0292 | 0.0927 | 0.0039 | 0.0064 | 0.0014 |
| V2  | bromodichloromethane          | ND              | ND     | ND     | ND     | ND     | 0.0003 | ND     | ND     | ND     | ND     | ND     | ND     |
| V3  | bromoform                     | ND              | ND     | ND     | ND     | 0.0004 | ND     |
| V4  | toluene                       | 0.0142          | 0.0122 | ND     | ND     | 0.0427 | 0.0094 | 0.0050 | 0.0017 | 0.0331 | 0.0089 | 0.0052 | 0.0005 |
| S5  | phenol                        | 0.5914          | 1.2571 | 0.0853 | 2.7198 | 0.0751 | 0.0054 | 0.4948 | 0.0124 | 0.0334 | 0.1144 | 0.0050 | 0.2060 |
| S6  | fluorene                      | 0.0041          | 0.0029 | 0.0017 | 0.0063 | 0.0059 | 0.0025 | 0.0070 | ND     | 0.0100 | 0.0046 | 0.0036 | 0.0042 |
| S7  | fluoranthene                  | 0.8659          | 0.5314 | 0.2300 | 1.3985 | 5.1284 | 2.5867 | 1.8042 | 0.0074 | 0.0123 | 0.0066 | 0.0036 | 0.6519 |
| S8  | dicamba                       | ND              | ND     | ND     | ND     | ND     | ND     | ND     | ND     | ND     | ND     | ND     | ND     |
| S9  | diethylphthalate              | 0.1236          | 0.3507 | 0.0888 | 0.4417 | 0.6192 | 0.0894 | 0.2322 | ND     | 0.0066 | ND     | ND     | 0.0785 |
| S10 | di- <i>n</i> -butyl phthalate | 0.7359          | 1.4278 | 0.2490 | 0.9203 | 0.6192 | 0.5191 | 2.0384 | 3.3188 | 0.0432 | ND     | ND     | 0.4928 |
| S11 | dinoseb                       | 0.0007          | 0.0007 | 0.0065 | 0.0004 | 0.0007 | ND     | ND     | 0.0004 | ND     | ND     | ND     | 0.0003 |
| I12 | perchlorate                   | 0.1192          | 0.4112 | ND     | ND     | 0.0558 | ND     | 3.0856 | ND     | ND     | ND     | ND     | 0.1086 |
| I13 | barium                        | 56.59           | 54.65  | 47.14  | 55.88  | 57.16  | 47.39  | 105.34 | 52.81  | 76.59  | 54.54  | 55.71  | 50.56  |
| I14 | beryllium                     | 0.0063          | 0.0065 | 0.0053 | 0.0055 | 0.0178 | 0.0198 | 0.0110 | 0.0088 | 0.0118 | 0.0078 | 0.0070 | 0.0055 |

<sup>a</sup>not detected.

**Table S6.** Mean value (µg/L) of hazardous substances in coastal stream with respect to the month (continuous).

| no. | compound             | month (µg/L)    |        |        |        |        |        |        |        |        |        |        |        |
|-----|----------------------|-----------------|--------|--------|--------|--------|--------|--------|--------|--------|--------|--------|--------|
|     |                      | 1               | 2      | 3      | 4      | 5      | 6      | 7      | 8      | 9      | 10     | 11     | 12     |
| I15 | boron                | 57.78           | 25.76  | 21.19  | 17.96  | 35.40  | 27.01  | 31.26  | 48.07  | 40.60  | 38.24  | 36.80  | 30.59  |
| I16 | manganese            | 175.99          | 292.04 | 226.18 | 313.04 | 306.44 | 178.70 | 312.06 | 220.37 | 192.18 | 209.58 | 202.91 | 186.77 |
| I17 | molybdenum           | 2.67            | 3.18   | 3.25   | 2.96   | 1.80   | 1.56   | 3.01   | 18.38  | 9.54   | 3.56   | 2.80   | 2.69   |
| I18 | selenium             | 1.27            | 0.81   | 0.55   | 0.78   | 0.50   | 0.46   | 1.01   | 0.82   | 1.28   | 0.78   | 0.79   | 0.61   |
| I19 | zinc                 | 21.72           | 45.11  | 15.31  | 32.29  | 50.40  | 20.05  | 8.71   | 14.87  | 21.62  | 8.44   | 10.20  | 17.31  |
| I20 | argentum             | 0.0033          | 0.0223 | 0.0045 | 0.0030 | 0.0133 | 0.0098 | 0.0340 | 0.0143 | 0.0420 | 0.0250 | 0.0033 | 0.0203 |
| P21 | metolachlor          | ND              | ND     | ND     | ND     | ND     | ND     | ND     | ND     | ND     | ND     | ND     | ND     |
| P22 | diuron               | 0.0064          | 0.0153 | 0.0106 | 0.0526 | 0.0352 | 0.0100 | 0.0163 | ND     | ND     | 0.0083 | 0.0068 | 0.0075 |
| P23 | hexachlorobenzene    | 0.0003          | 0.0005 | ND     | 0.0004 | 0.0038 | 0.0003 | 0.0006 | ND     | 0.0024 | 0.0007 | ND     | 0.0003 |
| P24 | carbofuran           | ND <sup>a</sup> | ND     | ND     | ND     | ND     | ND     | ND     | 0.2918 | ND     | ND     | ND     | ND     |
| P25 | heptachlor epoxide A | 0.0224          | 0.0726 | 0.0120 | 0.0284 | 0.0110 | 0.0055 | 0.0076 | ND     | ND     | ND     | ND     | 0.0118 |
| P26 | heptachlor epoxide B | ND              | ND     | ND     | ND     | 0.0005 | 0.0005 | ND     | ND     | 0.0008 | 0.0007 | ND     | ND     |
| P27 | heptachlor           | ND              | ND     | ND     | ND     | ND     | ND     | ND     | ND     | ND     | ND     | ND     | ND     |
| P28 | dieldrin             | 0.0107          | ND     | 0.0005 | 0.0238 | 0.0389 | 0.0249 | 0.0896 | 0.0286 | ND     | 0.0007 | ND     | ND     |
| P29 | bisphenol A          | ND              | ND     | ND     | 0.0969 | ND     | 0.0253 | ND     | ND     | ND     | 0.0007 | 0.001  | 0.0905 |
| P30 | quinoline            | ND              | ND     | ND     | ND     | ND     | ND     | ND     | ND     | ND     | ND     | ND     | ND     |

<sup>a</sup>not detected.



**Table S7.** Mean value (µg/L) of hazardous substances with respect to the coastal stream site.

| no. | compound                      | W1              | W4     | W5     | W6     |
|-----|-------------------------------|-----------------|--------|--------|--------|
| V1  | <i>o</i> -xylene              | 0.1829          | 0.1906 | 0.3119 | 0.2722 |
| V2  | bromodichloromethane          | ND <sup>a</sup> | 0.0003 | 0.0003 | 0.0003 |
| V3  | bromoform                     | ND              | ND     | ND     | 0.0004 |
| V4  | toluene                       | 0.0137          | 0.0075 | 0.0159 | 0.0138 |
| S5  | phenol                        | 0.0257          | 1.1282 | 0.0196 | 0.3731 |
| S6  | fluorene                      | 0.0034          | 0.0055 | 0.0016 | 0.0086 |
| S7  | fluoranthene                  | 0.5991          | 0.9457 | 0.4494 | 2.4146 |
| S8  | dicamba                       | ND              | ND     | ND     | ND     |
| S9  | diethylphthalate              | 0.0316          | 0.4813 | 0.0338 | 0.2853 |
| S10 | di- <i>n</i> -butyl phthalate | 0.4508          | 1.1289 | 0.9685 | 1.3616 |
| S11 | dinoseb                       | 0.0019          | 0.0029 | 0.0009 | 0.0013 |
| I12 | perchlorate                   | 0.3231          | 0.0873 | 1.9713 | 0.1001 |
| I13 | barium                        | 59.40           | 53.36  | 51.69  | 76.04  |
| I14 | beryllium                     | 0.0110          | 0.0085 | 0.0116 | 0.0062 |
| I15 | boron                         | 26.55           | 38.92  | 18.79  | 52.60  |
| I16 | manganese                     | 260.02          | 342.70 | 61.38  | 274.64 |
| I17 | molybdenum                    | 1.389           | 11.48  | 1.41   | 4.18   |
| I18 | selenium                      | 0.64            | 1.42   | 0.2818 | 0.8637 |
| I19 | zinc                          | 12.15           | 48.21  | 7.93   | 20.37  |
| I20 | argentum                      | 0.0133          | 0.0203 | 0.0121 | 0.0092 |
| P21 | metolachlor                   | ND              | ND     | ND     | ND     |
| P22 | diuron                        | 0.0308          | 0.0155 | 0.0004 | 0.0051 |
| P23 | hexachlorobenzene             | 0.0014          | 0.0016 | 0.0008 | 0.0015 |
| P24 | carbofuran                    | ND              | ND     | 0.2918 | ND     |
| P25 | heptachlor epoxide A          | 0.0045          | 0.0626 | 0.0008 | 0.0065 |
| P26 | heptachlor epoxide B          | 0.0008          | ND     | 0.0005 | 0.0005 |
| P27 | heptachlor                    | ND              | ND     | ND     | ND     |
| P28 | dieldrin                      | 0.0242          | 0.0269 | 0.0546 | 0.0294 |
| P29 | bisphenol A                   | 0.0268          | 0.1917 | 0.0094 | 0.0112 |
| P30 | quinoline                     | ND              | ND     | ND     | ND     |

<sup>a</sup>not detected.
